# Supplementary material for: Overexpression of the First Peanut-Susceptible Gene, AhS5H1 or AhS5H2, Enhanced Susceptibility to Pst DC3000 in Arabidopsis
Source: MDPI journal article supplement (doi:10.3390/ijms241814210), 2023-09-18
Supplement: s1 [file s1]

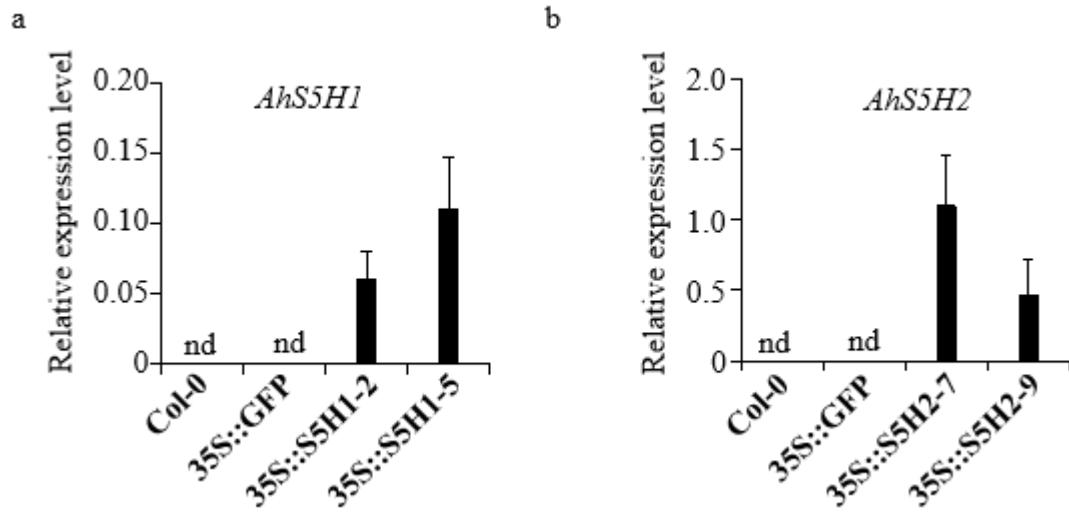

**Figure S1.** Expression of *AhS5H1* and *AhS5H2* in transgenic Arabidopsis. Expression level of *AhS5H1* (a) and *AhS5H2* (b) in transgenic Arabidopsis plants. Expression was determined by qRT-PCR using *AtACTIN2* as the reference gene. Values are means  $\pm$  SD ( $n = 3$ ). Nd, not detectable.

**Table S2.** The correlation between compounds content and *AhS5H* transcription level (r value).

| Compounds | <i>AhS5H1</i> | <i>AhS5H2</i> |
|-----------|---------------|---------------|
| SA        | -0.8438       | 0.9600        |
| 2,5-DHBA  | -0.7682       | 0.9319        |

Note: "+" indicates positive correlation; "-" indicates negative correlation. 0.8-1.0 indicates extremely high correlation; 0.6-0.8 indicates high correlation; 0.4-0.6 indicates moderately correlated; 0.2-0.4 indicates weak correlation; 0.0-0.2 indicates very weak or no correlation. The correlations between compounds content and *AhS5H* transcription levels were analyzed using the Pearson method of Microsoft Excel.
