# Supplementary material for: Overexpression of the First Peanut-Susceptible Gene, AhS5H1 or AhS5H2, Enhanced Susceptibility to Pst DC3000 in Arabidopsis
Source: Int J Mol Sci. 2023 Sep 18;24(18):14210. doi: 10.3390/ijms241814210 (PMC10531710; doi:10.3390/ijms241814210)
Supplement: Supplementary file 1 [file ijms-24-14210-s001.zip › Supplementary Material 1.xlsx]

## Sheet: primers
Supplemental Table S1. Primers sequences used in this study
Primer	Forward sequence(5'-3')	Reverse sequence(5'-3')
For protein expression
AhS5H1	CGCGGATCCTAAATGGCAAACACCAAGCCAT	ACACGTGAACCTTGAACAAATCCACAC
AhS5H2	ACACGTGAACCTTGAACAAATCCACAC	ACACGTGTTTGTTCTTGAAAAGTTCTA
For qRT-PCR
AhS5H1	CATTAGGCCCCTTAATGACCG	TTGGAGGCATCATTATCTTC
AhS5H2	TGGTGATCAACTGCAGGCTT	GTGAGTGGTTTAGCAGGGCT
AhACTIN	GATTGGAATGGAAGCTGCTG	CGGTCAGCAATACCAGGGAA
AhPR10	ATGTCCATGGATGGGCGTCTTCACTTTCGAG	GATGACTAGTTAATATTGAGTAGGGTTGG
AhNPR1	CCATCCATTTTGGTAGCACT	TTCTTCTCATTTCTCGCTCA
P.arachidicola 26S rDNA	CGTCGTTCTGAATGCAAAGC	CCTTCAAGCTCTGCTTGGTG
E. arachidis 26S rDNA	ATCGGTGGTATCGGCACAGT	TGGTGCATCTCGACGGACTTG
AtPR1	GCTCTTGTTCTTCCCTCGAAAG	GCCTCTTAGTTGTTCTGCGTAGCT
AtPR2	ATCTCCCTTGCTCGTGAATCTCT	TCGAGATTTGCGTCGAATAGG
AtACTIN2	GGTAACATTGTGCTCAGTGGTGG	CTCGGCCTTGGAGATCCACATC
